# Supplementary material for: Electrode dependence of resistive switching in Au/Ni–Au nanoparticle devices
Source: Royal Society of Chemistry journal article supplement (doi:10.1039/c4ra05662k), 2014-08-18
Supplement: c4ra05662k1.pdf [file c4ra05662k1.pdf]

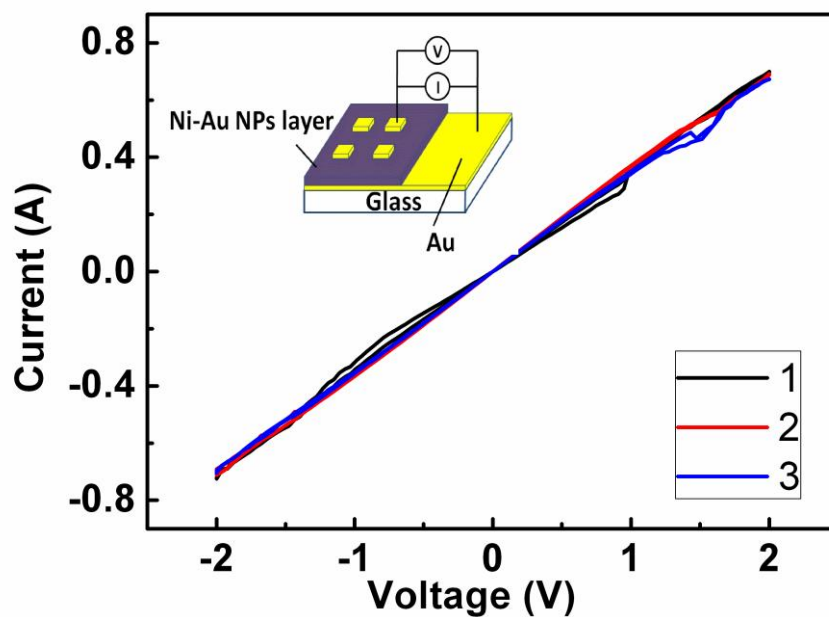

Figure S1. I-V characteristics of Au/Ni-Au NPs/Au device.

For reviewer's comments, another two Au/Ni-Au NPs/ITO and Au/Ni-Au NPs/NSTO devices were fabricated and 4-5 curves for each temperature are showed below:

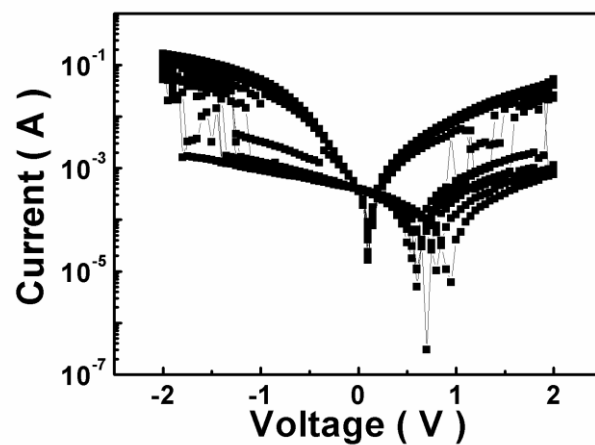

**Figure S2.** Resistive switching behaviors of Au/Ni-Au NPs/ITO device at room temperature.

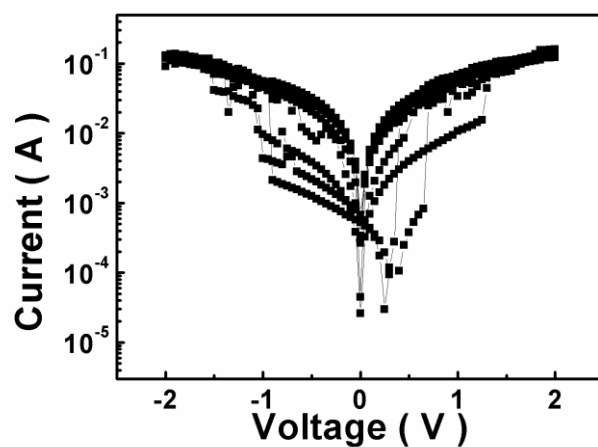

**Figure S3.** Resistive switching behaviors of Au/Ni-Au NPs/ITO device at 250 K.

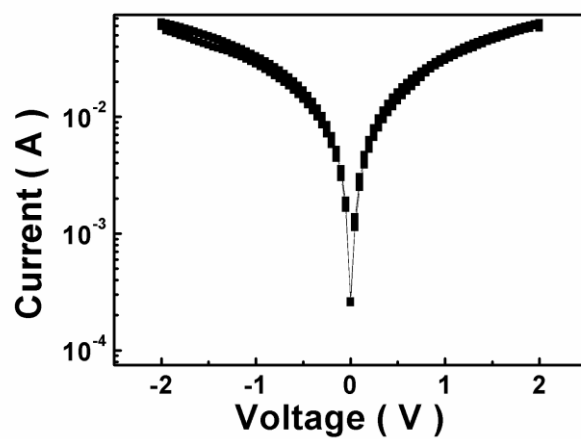

**Figure S4.** Resistive switching behaviors of Au/Ni-Au NPs/ITO device at 200 K.

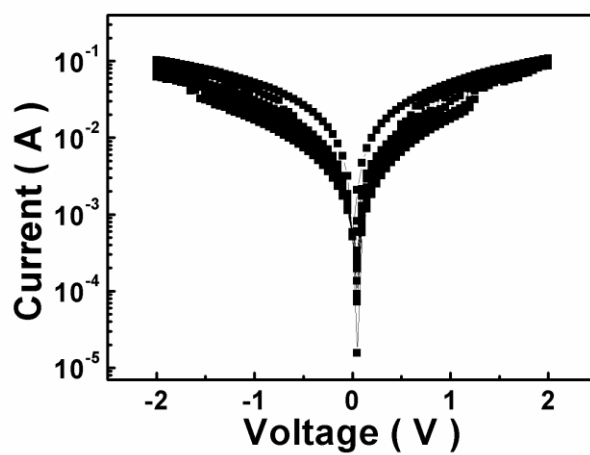

**Figure S5.** Resistive switching behaviors of Au/Ni-Au NPs/NSTO device at room

temperature.

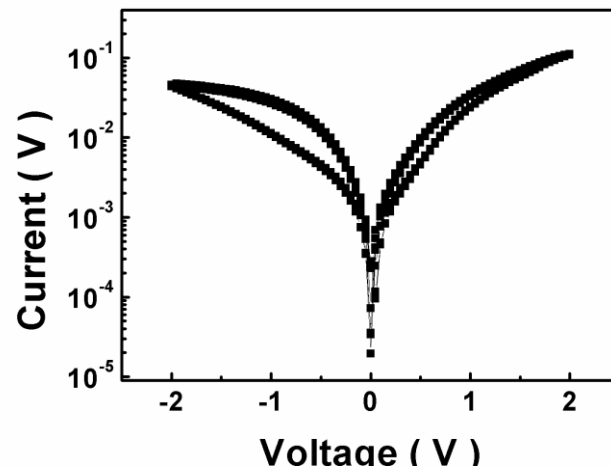

**Figure S6.** Resistive switching behaviors of Au/Ni-Au NPs/NSTO device at 250 K.

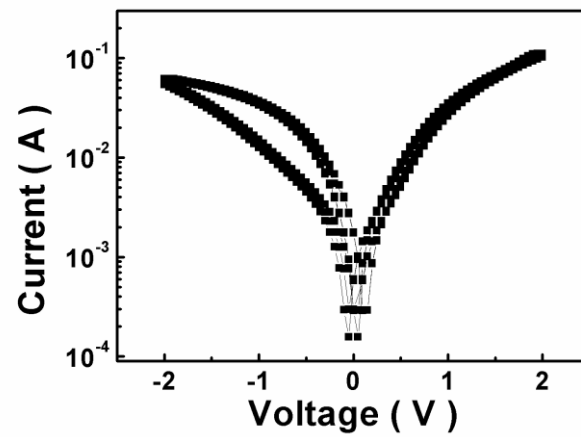

**Figure S7.** Resistive switching behaviors of Au/Ni-Au NPs/NSTO device at 200 K.
